# Supplementary material
Source: ML conference proceedings conference paper supplement (https://openaccess.thecvf.com/content/CVPR2024/html/Cho_Language-conditioned_Detection_Transformer_CVPR_2024_paper.html)
Supplement: Supplementary file 1 [file Cho_Language-conditioned_Detection_Transformer_CVPR_2024_supplemental.pdf]

# Language-conditioned Detection Transformer

## Supplementary Material

### 7. Comparing to OV-DETR [66].

**Conditioning mechanism.** Figure 5 illustrates the difference in conditioning mechanism and multi-class inference between **DECOLA** and OV-DETR. During training Phase 1, **DECOLA** learns to use text embedding of each present object class in order to locate proposals. **DECOLA** learns **dense language-vision alignment** by modeling the objectness function as the similarity score between text embedding and proposal features defined as equation 3 in the Section 4 of the main paper. **DECOLA** transforms equal number of proposals into query embedding to sufficiently cover all classes. On the other hand, OV-DETR trains with the same DETR object queries and add CLIP features of randomly sampled object classes. This difference results in a significant improvement in *conditioned* AP and AR (+9.1 c-AP@20, +16.5 c-AR), as shown in Figure 4a and 4c of the main paper.

**Multi-class detection.** **DECOLA** finetunes for multi-class object detection during Phase 2 whereas OV-DETR maintains the original conditioning mechanism for finetuning. Finetuning with multi-class detection objective is critical for the final detection task: Detector needs to **calibrate the multi-class scores** over the dataset-level vocabulary to maximize mAP. OV-DETR trains with randomly sampled set of classes every iteration, which makes it unable to properly rank objects over all classes. This leads to a severe degradation in frequent classes as shown in Table 1 of the main paper. Moreover, the conditioning mechanism of OV-DETR requires *splitting* the text vocabulary over multiple chunks. For LVIS dataset, OV-DETR needs about 40 forward passes for every image at inference, leading to a substantial difference in speed at run-time (0.07 vs 6.4 sec / img) as shown in Table 6 of the main paper. The final models, **DECOLA** Phase 2 and OV-DETR<sup>†</sup> under identical training and architectural settings, exhibit large difference of 5.8 AP<sub>novel</sub> and 7.7 mAP, as shown in Table 1 of the main paper.

**Training setup.** Both models are trained on LVIS-base for 4× (**DECOLA** Phase 1 and OV-DETR). OV-DETR undergoes extra 4× with the original self-training using CLIP labeling [66]. This model is the same as the original OV-DETR reported in the original paper. We further finetune **DECOLA** and OV-DETR on ImageNet-21K for 4× for fair comparison, which result **DECOLA** Phase 2 and OV-DETR<sup>†</sup>.

### 8. Experimental Details

**Training configuration.** We closely follow [74] to train **DECOLA** as well as *baseline* for both Deformable DETR and CenterNet2 results. Table 7a and 7b highlight important hyper-parameters in all experiments with Deformable

DETR. For experiments with CenterNet2, we follow the same training and model configuration as Detic [74]. For all experiments, we used 8 V100 GPUs with 32G memory. All models are trained on float16 using Automatic Mixed Precision from PyTorch [46]. With this computing environment, training **DECOLA** for Deformable DETR with ResNet-50 backbone takes about 50 hours and the baseline takes about 45 hours for 4× training schedule. For ImageNet-21K pre-trained ResNet-50, we used the model from Ridnik *et al.* [50] consistent with [74]. Our codebase uses Detectron2 [64] based on PyTorch [46]. For *direct zero-shot transfer to LVIS* experiments, we use Swin-T and L [39] pretrained on ImageNet-21K. For both methods, we train Phase 1 on Object365 same number of iterations as GLIP [34]. We finetune Phase 2 on the entire ImageNet-21K for Swin-T, and ImageNet-21K and OpenImages [32] for the same number of iterations as Phase 1. Please note that the model may continue to improve as training longer. Swin-L model is trained with 2 nodes of 8 V100 machines, with 32 images per global batch. All our experiments are conducted under academic-scale compute and open-sourced datasets.

### 9. Additional Experimental Results

**Conditioned AP.** Table 8 and 9 compare *conditioned* mAP and AP<sub>novel</sub> of baseline and **DECOLA** Phase 1. We show AP with different per image detection limit, reported with @k. *Conditioned* AP is defined in Section 5.1. Results at low detection limit follows more closely to the labeling quality; pseudo-labels are sampled based on the confidence score and typically only save the top-1 prediction. **DECOLA** consistently improve baseline not only for novel classes but for overall. This difference is the core reason for **DECOLA**'s scalability by self-training.

**Box-efficient detector.** In this section, we highlight an interesting property of **DECOLA**. Object detectors for large-vocabulary dataset often tend to **over-shoot** predictions with a high number of boxes in order to increase recall for rare object classes. This behavior may be undesirable since lots of spammed boxes makes it difficult to interpret for downstream tasks. Therefore, Table 11 and 12 report c-AP of baseline and **DECOLA** Phase 1 *with a limited number of query (prediction) per class*.  $n = 1$  means the detector only gets to predict a single box for each class present in image. Please recall that c-AP provides a set of present classes during inference. We show that **DECOLA** show highly accurate predictions with low per-image detection limit.

**Impact of different pre-training.** Table 13 shows how backbone pretraining impact the final result on **DECOLA** as

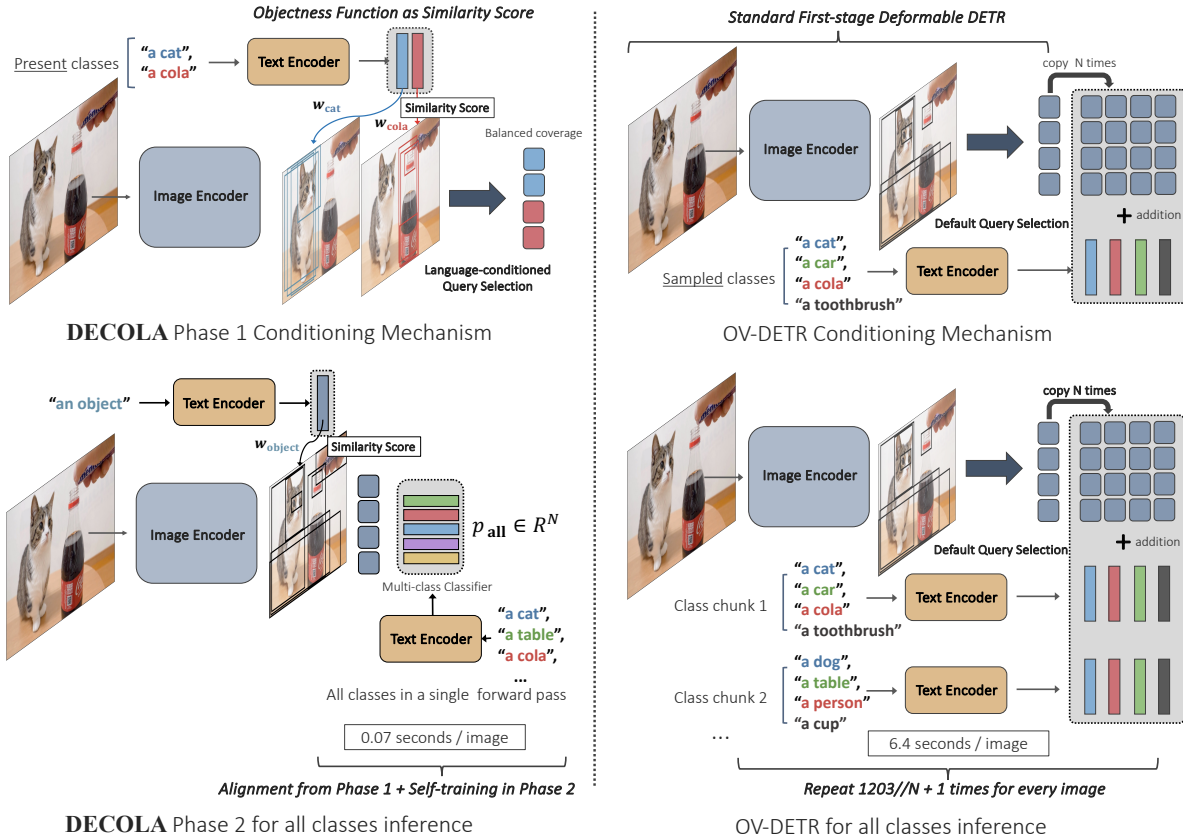

Figure 5. **Difference in conditioning mechanism and multi-class inference between DECOLA and OV-DETR.** DECOLA produces different *proposals* for each present object class in image by modeling the objectness function with the similarity score between text embedding and proposal feature. OV-DETR copies object queries from the first-stage DETR and add CLIP features. Bottom row illustrates how DECOLA and OV-DETR performs multi-class detection.

well as the *baseline*. In Table 13, ImageNet-21K worked the best overall, but surprisingly there was no substantial difference in  $AP_{\text{novel}}^{\text{box}}$  from Deformable DETR framework, contrary to the finding in [74] with CenterNet2 detector. Here all models are trained on LVIS-base. Table 13b shows that pretraining on Object365 substantially improve LVIS result. Since both Object365 and LVIS are large-scale detection datasets of natural objects, we expect some degree of semantic overlap between the datasets.

**Co-training.** DECOLA trains language-conditioning and multi-class prediction in two separate phases. Here, we explore if we can co-train both conditioning and multi-class prediction. Specifically, we set a probability  $p$  to train a detector by language-condition (conditioning the first-stage with class name) and multi-class (conditioning the first-stage with “an object”) and using multi-class classifier with text embedding same as *baseline*. Table 10e reports the conditioned AP after training  $4\times$  on LVIS-base with different  $p$ . We observe that c-AP is maximized with  $p = 0.0$ , but mAP can match with the standard detection training with

$p = 0.5$ . Table 10f extends co-training to finetuning for Phase 2 on weakly labeled data. Here  $p_1 \rightarrow p_2$  denotes the sampling probability of “a object” conditioning for LVIS-base ( $p_1$ ) and LVIS-base and ImageNet-21K ( $p_2$ ). We confirm that the quality of pseudo-labels is the most important for finetuning with weakly-labeled data.

**Other ablations.** In Table 10a, we show that DECOLA label improves using box regression loss. Detic [74] only trains for classification loss since max-size loss samples pseudo-label that does not localize object accurately. This improvement shows that DECOLA label provides a significant supervisory signal for localization as well as classification. In DECOLA Phase 1, each query is conditioned to an object class and predicts a *single* score after decoding layers (“single”). Table 10c explores different second-stage formulation. After the first stage, we ignore the conditioned classes and predict multi-class scores after decoding layers, denoted as “multi”.

| config                         | baseline training               | baseline + self-train           |
|--------------------------------|---------------------------------|---------------------------------|
| <i>shared configuration</i>    |                                 |                                 |
| optimizer                      | AdamW [40]                      | AdamW [40]                      |
| optimizer momentum             | $\beta_1, \beta_2 = 0.9, 0.999$ | $\beta_1, \beta_2 = 0.9, 0.999$ |
| weight decay                   | 0.0001                          | 0.0001                          |
| total iterations               | 360000                          | 360000                          |
| base learning rate             | 0.0002                          | 0.0002                          |
| learning rate schedule         | step decay                      | step decay                      |
| learning rate decay factor     | 0.1                             | 0.1                             |
| learning rate decay step       | 300000                          | 300000                          |
| gradient clip value            | 0.01                            | 0.01                            |
| gradient clip norm             | 2.0                             | 2.0                             |
| <i>different configuration</i> |                                 |                                 |
| batch size                     | 16                              | (16, 64)                        |
| dataset ratio                  | n/a                             | 1 : 4 [74]                      |
| image min-size range           | (480, 800)                      | ((480, 800), (240, 400)) [74]   |
| image max-size                 | 1333                            | (1333, 667) [74]                |
| input augmentation             | DETR-style [3]                  | resize shortest edge [74]       |
| input sampling                 | repeated factor sampling [20]   | (repeated factor [20], random)  |

(a) Training configuration. The values inside parentheses are for LVIS and ImageNet-21K, respectively.

| config                                    | baseline            | DECOLA Phase 1       | DECOLA Phase 2      |
|-------------------------------------------|---------------------|----------------------|---------------------|
| <i>shared configuration</i>               |                     |                      |                     |
| cls weight                                | 2.0                 | 2.0                  | 2.0                 |
| giou weight                               | 2.0                 | 2.0                  | 2.0                 |
| l1 weight                                 | 5.0                 | 5.0                  | 5.0                 |
| two-stage                                 | True                | True                 | True                |
| box refinement                            | True                | True                 | True                |
| feed-forward dim.                         | 1024                | 1024                 | 1024                |
| look-forward-twice                        | True                | True                 | True                |
| drop-out rate                             | 0.0                 | 0.0                  | 0.0                 |
| <i>different configuration</i>            |                     |                      |                     |
| number of queries                         | 300                 | 300 per class        | 300                 |
| classification loss type                  | federated loss [73] | binary cross-entropy | federated loss [73] |
| 1st-stage classifier type                 | learnable           | “a [class name].”    | “an object.”        |
| 1st-stage classifier norm                 | n/a                 | L2                   | L2                  |
| 1st-stage classifier temp.                | n/a                 | 50                   | 50                  |
| 1st-stage top- $k$ per class <sup>†</sup> | n/a                 | 10000                | n/a                 |
| 2nd-stage classifier type                 | “a [class name].”   | “a [class name].”    | “a [class name].”   |
| 2nd-stage classifier norm                 | L2                  | L2                   | L2                  |
| 2nd-stage classifier temp.                | 50                  | 50                   | 50                  |
| classifier # classes <sup>‡</sup>         | 1203                | 1                    | 1203                |
| classifier bias init. value               | $-\log(0.99/0.01)$  | $-\log(0.99/0.01)$   | $-\log(0.99/0.01)$  |

(b) Model configuration.

Table 7. **Configurations.** Training and model details for experiments with Deformable DETR. <sup>†</sup> is the top- $k$  only for Hungarian matching and loss computation to reduce computation, as explained in the main paper. <sup>‡</sup> is for LVIS experiments. Here **DECOLA** for language-condition training has # classes as 1, since the second-stage with language-conditioned query is binary classification as opposed to multi-class classification in baseline and open-vocabulary detection.

## 10. Qualitative Results

We show more visualization. Figure 6 and 7 show randomly sampled images and the pseudo-labels of **DECOLA** and baseline. Images are from the ImageNet-21K from *unseen* categories, which none of the models are trained on. Boxes are the most confident prediction from **DECOLA** and *baseline* and maximum size box ([74]). **Green**: the most confident prediction (max-score) **DECOLA** trained on LVIS-base. **Red**: the most confident prediction (max-score) *baseline* trained on LVIS-base. **Purple**: the largest box prediction (max-

size, Detic loss [74]) *baseline* trained on LVIS-base. All models use a Deformable DETR detector with a ResNet-50 backbone. We show randomly sampled images.

| model            | data      | c-AP <sub>novel</sub> <sup>box</sup> @10 | c-AP <sub>novel</sub> <sup>box</sup> @20 | c-AP <sub>novel</sub> <sup>box</sup> @50 | c-AP <sub>novel</sub> <sup>box</sup> @100 | c-AP <sub>novel</sub> <sup>box</sup> @300 |
|------------------|-----------|------------------------------------------|------------------------------------------|------------------------------------------|-------------------------------------------|-------------------------------------------|
| <i>ResNet-50</i> |           |                                          |                                          |                                          |                                           |                                           |
| baseline         | LVIS-base | 6.0                                      | 11.3                                     | 19.2                                     | 26.8                                      | 31.9                                      |
| DECOLA Phase 1   | LVIS-base | 19.4 (+13.4)                             | 28.5 (+17.2)                             | 34.1 (+14.9)                             | 38.7 (+11.9)                              | 40.0 (+8.1)                               |
| <i>Swin-B</i>    |           |                                          |                                          |                                          |                                           |                                           |
| baseline         | LVIS-base | 7.4                                      | 16.1                                     | 27.5                                     | 33.1                                      | 41.9                                      |
| DECOLA Phase 1   | LVIS-base | 21.9 (+14.5)                             | 32.0 (+15.9)                             | 40.0 (+12.5)                             | 44.0 (+6.9)                               | 47.7 (+5.8)                               |

(a) c-AP of unseen categories at different  $k$ .

| model            | data | c-AP <sub>rare</sub> <sup>box</sup> @10 | c-AP <sub>rare</sub> <sup>box</sup> @20 | c-AP <sub>rare</sub> <sup>box</sup> @50 | c-AP <sub>rare</sub> <sup>box</sup> @100 | c-AP <sub>rare</sub> <sup>box</sup> @300 |
|------------------|------|-----------------------------------------|-----------------------------------------|-----------------------------------------|------------------------------------------|------------------------------------------|
| <i>ResNet-50</i> |      |                                         |                                         |                                         |                                          |                                          |
| baseline         | LVIS | 21.3                                    | 29.4                                    | 36.9                                    | 41.1                                     | 44.6                                     |
| DECOLA Phase 1   | LVIS | 26.6 (+5.3)                             | 39.1 (+9.7)                             | 45.2 (+8.3)                             | 47.1 (+6.0)                              | 48.8 (+4.2)                              |
| <i>Swin-B</i>    |      |                                         |                                         |                                         |                                          |                                          |
| baseline         | LVIS | 30.1                                    | 38.2                                    | 45.5                                    | 49.3                                     | 53.2                                     |
| DECOLA Phase 1   | LVIS | 33.5 (+3.4)                             | 43.9 (+5.7)                             | 51.4 (+5.9)                             | 53.8 (+4.5)                              | 55.8 (+2.6)                              |

(b) c-AP of rare categories at different  $k$ .

Table 8. **Conditioned AP<sub>rare/novel</sub>** result of DECOLA Phase 1 and baseline pre-trained on LVIS-base (*top*) and LVIS (*bottom*). **Conditioned AP** measures detection performance when the set of object categories present in each image is given. baseline adapts its classification layer to the classes and DECOLA conditions itself to the classes, as described in Section 4 of the main paper.

| model            | data      | c-mAP <sup>box</sup> @10 | c-mAP <sup>box</sup> @20 | c-mAP <sup>box</sup> @50 | c-mAP <sup>box</sup> @100 | c-mAP <sup>box</sup> @300 |
|------------------|-----------|--------------------------|--------------------------|--------------------------|---------------------------|---------------------------|
| <i>ResNet-50</i> |           |                          |                          |                          |                           |                           |
| baseline         | LVIS-base | 24.4                     | 29.8                     | 35.0                     | 37.9                      | 40.2                      |
| DECOLA Phase 1   | LVIS-base | 30.0 (+5.6)              | 36.8 (+7.0)              | 41.9 (+6.9)              | 44.2 (+6.3)               | 45.6 (+5.4)               |
| <i>Swin-B</i>    |           |                          |                          |                          |                           |                           |
| baseline         | LVIS-base | 29.6                     | 36.9                     | 43.4                     | 46.0                      | 48.8                      |
| DECOLA Phase 1   | LVIS-base | 33.5 (+3.9)              | 41.3 (+4.4)              | 47.4 (+4.0)              | 49.7 (+3.7)               | 51.5 (+2.7)               |

(a) c-mAP of all categories at different  $k$ .

| model            | data | c-mAP <sup>box</sup> @10 | c-mAP <sup>box</sup> @20 | c-mAP <sup>box</sup> @50 | c-mAP <sup>box</sup> @100 | c-mAP <sup>box</sup> @300 |
|------------------|------|--------------------------|--------------------------|--------------------------|---------------------------|---------------------------|
| <i>ResNet-50</i> |      |                          |                          |                          |                           |                           |
| baseline         | LVIS | 27.3                     | 33.4                     | 38.8                     | 41.2                      | 43.1                      |
| DECOLA Phase 1   | LVIS | 31.1 (+3.8)              | 38.5 (+5.1)              | 43.7 (+4.9)              | 45.6 (+4.4)               | 47.1 (+4.0)               |
| <i>Swin-B</i>    |      |                          |                          |                          |                           |                           |
| baseline         | LVIS | 33.3                     | 40.4                     | 46.2                     | 48.6                      | 50.5                      |
| DECOLA Phase 1   | LVIS | 35.7 (+2.4)              | 43.6 (+3.2)              | 49.4 (+3.2)              | 51.6 (+3.0)               | 53.2 (+2.7)               |

(b) c-mAP of all categories at different  $k$ .

Table 9. **Conditioned mAP** result of DECOLA in phase 1 and baseline pre-trained on LVIS-base (*top*) and LVIS (*bottom*). **Conditioned mAP** measures detection performance when the set of object categories present in each image is known. baseline adapts its classification layer to the classes and DECOLA condition itself to the classes, as described in Section 4 of the main paper.

| model        | reg. loss | AP <sub>novel</sub> <sup>box</sup> | mAP <sup>box</sup> | model                   | AP <sub>novel</sub> <sup>box</sup> | mAP <sup>box</sup> | type   | c-AP <sub>novel</sub> <sup>box</sup> | c-mAP <sup>box</sup> |
|--------------|-----------|------------------------------------|--------------------|-------------------------|------------------------------------|--------------------|--------|--------------------------------------|----------------------|
| DECOLA label |           | 27.6                               | 36.6               | baseline + DECOLA label | 25.1                               | 36.9               | multi  | 14.2                                 | 20.7                 |
| DECOLA label | ✓         | 29.5                               | 37.7               | DECOLA Phase 2          | 27.6                               | 38.3               | single | 28.5                                 | 40.0                 |

(a) **Box regression loss** for weak data. (b) **DECOLA Phase 2 vs. baseline + DECOLA label**. (c) **Second-stage type** for Phase 1 ( $k = 20$ ).

| type  | c-AP <sub>novel</sub> <sup>box</sup> | c-mAP <sup>box</sup> | $p$ | c-AP <sub>novel</sub> <sup>box</sup> | mAP <sup>box</sup> | $p$       | AP <sub>novel</sub> <sup>box</sup> | AP <sub>c</sub> <sup>box</sup> | AP <sub>f</sub> <sup>box</sup> | mAP <sup>box</sup> |
|-------|--------------------------------------|----------------------|-----|--------------------------------------|--------------------|-----------|------------------------------------|--------------------------------|--------------------------------|--------------------|
| base  | 20.9                                 | 30.4                 | 1.0 | 10.7                                 | 30.2               | 0.5 → 0.5 | 21.0                               | 31.9                           | 37.0                           | 32.0               |
| text  | 21.2                                 | 31.6                 | 0.5 | 19.1                                 | 30.2               | 0.5 → 1.0 | 20.8                               | 33.2                           | 37.8                           | 32.9               |
| image | 22.3                                 | 35.1                 | 0.0 | 22.3                                 | n/a                | 0.0 → 1.0 | 23.8                               | 34.4                           | 38.3                           | 34.1               |

(d) **Query types** ( $k = 20$ ). (e) **Co-training**: Phase 1 ( $k = 20$ ). (f) **Co-training**: Phase 2.

Table 10. **Additional results**. open-vocabulary LVIS results for various ablation study. We used Deformable DETR with ResNet-50 for all models here. For all results with c-AP, we use Phase 1.  $k$  represents the detection limit per image. Note that the bottom row tables (d), (e), (f) are trained with DECOLA and *baseline* trained using ResNet-50 pretrained with ImageNet-1K.

| model            | data      | $n = 1$      | $n = 2$      | $n = 5$      | $n = 10$    | $n = 20$    |
|------------------|-----------|--------------|--------------|--------------|-------------|-------------|
| <i>ResNet-50</i> |           |              |              |              |             |             |
| baseline         | LVIS-base | 14.7         | 22.4         | 27.6         | 30.9        | 32.2        |
| DECOLA Phase 1   | LVIS-base | 25.2 (+10.5) | 31.4 (+9.0)  | 36.0 (+8.4)  | 37.9 (+7.0) | 39.9 (+7.7) |
| <i>Swin-B</i>    |           |              |              |              |             |             |
| baseline         | LVIS-base | 17.8         | 26.0         | 33.7         | 37.6        | 40.9        |
| DECOLA Phase 1   | LVIS-base | 31.0 (+13.2) | 37.3 (+11.3) | 44.1 (+10.4) | 46.2 (+8.6) | 47.2 (+6.3) |

(a) *Conditioned* AP of unseen categories with different number of queries *per class*.

| model            | data | $n = 1$      | $n = 2$      | $n = 5$     | $n = 10$    | $n = 20$    |
|------------------|------|--------------|--------------|-------------|-------------|-------------|
| <i>ResNet-50</i> |      |              |              |             |             |             |
| baseline         | LVIS | 17.8         | 24.8         | 33.0        | 38.7        | 42.3        |
| DECOLA Phase 1   | LVIS | 29.7 (+11.9) | 36.7 (+11.9) | 41.8 (+8.8) | 45.9 (+7.2) | 48.3 (+6.0) |
| <i>Swin-B</i>    |      |              |              |             |             |             |
| baseline         | LVIS | 20.7         | 29.9         | 42.4        | 48.4        | 51.6        |
| DECOLA Phase 1   | LVIS | 34.5 (+13.8) | 42.3 (+12.4) | 49.0 (+6.6) | 50.8 (+2.4) | 52.7 (+1.1) |

(b) *Conditioned* AP of rare categories with different number of queries *per class*.

Table 11. **DECOLA is more box-efficient (c-AP<sub>rare/novel</sub>)**. We measure *conditioned* AP of rare/unseen classes (c-AP<sub>rare/novel</sub>) of DECOLA Phase 1 and baseline pre-trained on LVIS-base (*top*) and LVIS (*bottom*) with different *per-class* number of query. DECOLA uses  $n = |Q_y|$  language-conditioned queries for each class in image. Baseline uses  $n \cdot |C_x|$  object queries where  $C_x$  is the set of object classes in image  $x$ . Two models use the same total number of object queries.

| model            | data      | $n = 1$      | $n = 2$     | $n = 5$     | $n = 10$    | $n = 20$    |
|------------------|-----------|--------------|-------------|-------------|-------------|-------------|
| <i>ResNet-50</i> |           |              |             |             |             |             |
| baseline         | LVIS-base | 14.8         | 22.2        | 29.6        | 33.6        | 35.2        |
| DECOLA Phase 1   | LVIS-base | 24.5 (+9.7)  | 31.5 (+9.3) | 37.9 (+8.3) | 41.1 (+7.5) | 43.4 (+8.2) |
| <i>Swin-B</i>    |           |              |             |             |             |             |
| baseline         | LVIS-base | 18.0         | 26.9        | 36.6        | 41.0        | 43.4        |
| DECOLA Phase 1   | LVIS-base | 28.0 (+10.0) | 35.2 (+8.3) | 42.7 (+6.1) | 46.5 (+5.5) | 48.9 (+5.5) |

(a) *Conditioned* mAP of all categories with different number of queries *per class*.

| model            | data | $n = 1$      | $n = 2$     | $n = 5$     | $n = 10$    | $n = 20$    |
|------------------|------|--------------|-------------|-------------|-------------|-------------|
| <i>ResNet-50</i> |      |              |             |             |             |             |
| baseline         | LVIS | 15.0         | 22.6        | 31.1        | 35.7        | 38.3        |
| DECOLA Phase 1   | LVIS | 25.5 (+10.5) | 32.2 (+9.6) | 38.9 (+7.8) | 42.6 (+6.9) | 44.8 (+6.5) |
| <i>Swin-B</i>    |      |              |             |             |             |             |
| baseline         | LVIS | 18.3         | 27.2        | 37.6        | 42.4        | 44.4        |
| DECOLA Phase 1   | LVIS | 29.3 (+11.0) | 36.8 (+9.6) | 44.0 (+6.4) | 47.7 (+5.3) | 50.1 (+5.7) |

(b) *Conditioned* mAP of all categories with different number of queries *per class*.

Table 12. **DECOLA is more box-efficient (c-mAP)**. We measure *Conditioned* mAP of DECOLA Phase 1 and baseline pre-trained on LVIS-base (*top*) and LVIS (*bottom*) with different *per-class* number of query. DECOLA uses  $n = |Q_y|$  language-conditioned queries for each class in image. Baseline uses  $n \cdot |C_x|$  object queries where  $C_x$  is the set of object classes in image  $x$ . Two models use the same total number of object queries. *Conditioned* mAP measures with  $k = 300$  per-image detection limit.

| method                | pretrain        | AP <sub>novel</sub> <sup>box</sup> | AP <sub>c</sub> <sup>box</sup> | AP <sub>f</sub> <sup>box</sup> | mAP <sup>box</sup> |
|-----------------------|-----------------|------------------------------------|--------------------------------|--------------------------------|--------------------|
| baseline              | IN-1K           | 10.2                               | 30.9                           | 38.0                           | 30.1               |
|                       | RegionCLIP [72] | 9.1                                | 32.6                           | 39.9                           | 31.4               |
|                       | IN-21K          | 9.4 (-0.8)                         | 33.8 (+2.9)                    | 40.4 (+2.4)                    | 32.2 (+2.1)        |
| baseline + self-train | IN-1K           | 19.2                               | 31.7                           | 37.1                           | 31.7               |
|                       | IN-21K          | 23.2 (+4.0)                        | 36.5 (+4.8)                    | 41.6 (+4.5)                    | 36.2 (+4.5)        |
| DECOLA Phase 2        | IN-1K           | 23.8                               | 34.4                           | 38.3                           | 34.1               |
|                       | IN-21K          | 27.6 (+3.8)                        | 38.3 (+3.9)                    | 42.9 (+4.6)                    | 38.3 (+4.2)        |

(a) Impact of the backbone pretrain.

| method         | O365 | c-AP <sub>rare</sub> <sup>box</sup> <sub>@300</sub> | c-AP <sub>c</sub> <sup>box</sup> <sub>@300</sub> | c-AP <sub>f</sub> <sup>box</sup> <sub>@300</sub> | c-mAP <sup>box</sup> <sub>@300</sub> |
|----------------|------|-----------------------------------------------------|--------------------------------------------------|--------------------------------------------------|--------------------------------------|
| DECOLA Phase 1 |      | 54.6                                                | 52.7                                             | 52.3                                             | 52.9                                 |
|                | ✓    | 62.0 (+7.4)                                         | 62.0 (+9.3)                                      | 61.6 (+9.3)                                      | 61.8 (+8.9)                          |

(b) Impact of Object365 [53] pretrain on DECOLA Phase 1.

Table 13. **Impact of different pretraining**. Evaluated on open-vocabulary LVIS with ResNet-50 Deformable DETR (top) and large-vocabulary LVIS with Swin-L Deformable DETR (bottom). We explore the impact of different pretraining on the final mAP (top) and conditioned AP (bottom).

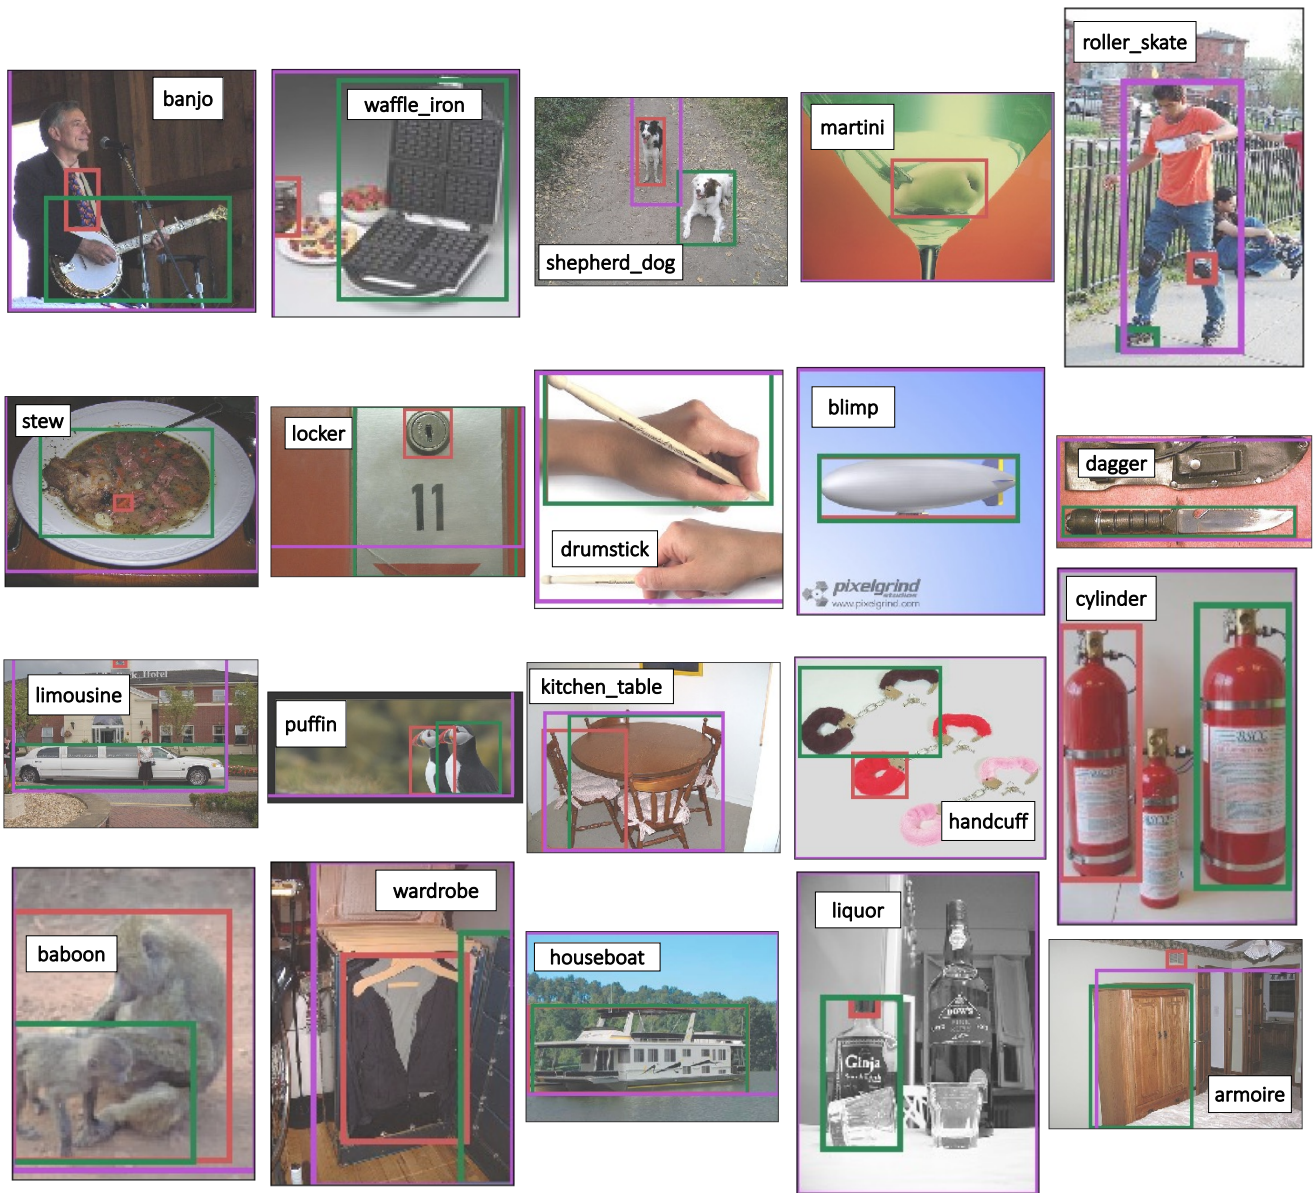

Figure 6. Random samples of prediction on unseen categories.

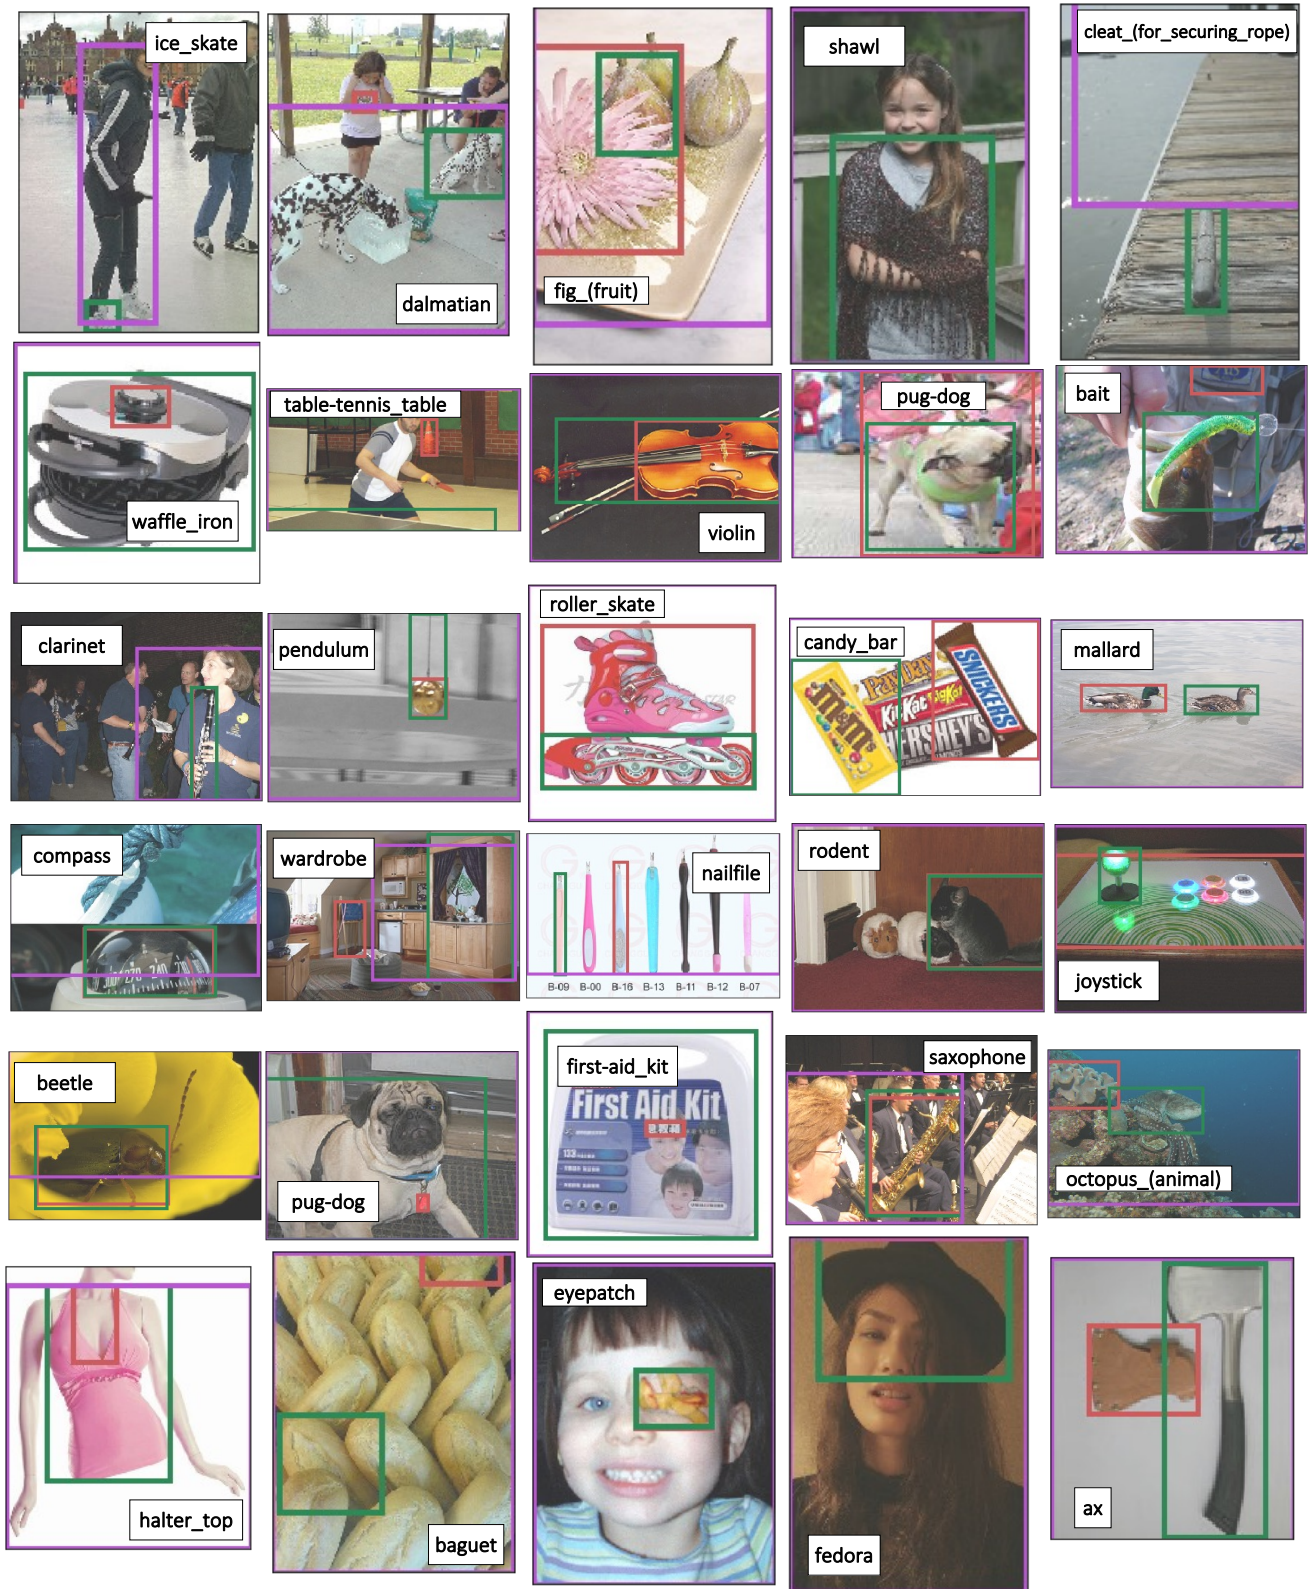

Figure 7. Random samples of prediction on unseen categories.
